# Supplementary material for: Ultra-inert lanthanide chelates as mass tags for multiplexed bioanalysis
Source: Research Square preprint supplement (doi:10.21203/rs.3.rs-4001082/v1), 2024-03-22
Supplement: Supplementary file 1 [file 1d61522778a8a119c624a4b3.xlsx]

## Sheet: Validation_ICP-MS
		ICP-MS
	Reference:
	V. Barwick (Ed), Eurachem/CITAC Guide: Guide to Quality in Analytical Chemistry: An Aid to Accreditation (3rd ed. 2016). ISBN 978-0-948926-32-7. Available from www.eurachem.org.
	Due to complete combustion of organic material in the plasma, validation of ClickZip tags was performed with Lu(NO3)3, Yb(NO3)3
	and Tm(NO3)3 instead of the corresponding HO2CPh{Lu}, HO2CPh{Yb} and HO2CPh{Tm} (with Y(NO3)3 as an internal standard).
	limit of detection (LOD) and limit of quantification (LOQ):
	Pentaplicate solutions of Lu3+, Yb3+ and Tm3+ (all in form of nitrate) in concentration range of 0.5 and 1.0 ng × L−1 were prepared by dilution of 1 ng × L−1 stock solutions in a matrix blank (2% HNO3) with Y3+ (in form of nitrate) internal standard solution.
	raw data													calculations Lu								calculations Yb								calculations Tm
	c, ng × L−1	175Lu, cps	174Yb, cps	169Tm, cps	89Y, cps									Lu/Y	(ci − cav)2							Yb/Y	(ci − cav)2							Tm/Y	(ci − cav)2
	0	0	3.11554	0.8	37543.7									0	0.25							8.29845e-05	0.25							2.13085e-05	0.25
	0	0	0.710852	0	39209.8									0	0.25							1.81294e-05	0.25							0	0.25
	0	0.8	3.87332	0.8	38950.7					LOD and LOQ Lu:				2.05388e-05	0.25							9.94414e-05	0.25							2.05388e-05	0.25
	0	0	-0.107916	0	38883.3					LOD =	0.148809	ng × L−1		0	0.25		parameters Lu					-2.77539e-06	0.25				parameters Yb			0	0.25		parameters Tm
	0	0	3.07332	0	38202.3					LOQ =	0.446428	ng × L−1		0	0.25		b0 (intercept)			3.29977e-05		8.04485e-05	0.25		b0 (intercept)			6.33981e-05		0	0.25		b0 (intercept)			1.16809e-05
	0.5	28	13.5015	32.8	38990.8									0.000718119	0		b1 (slope)			0.00129806		0.000346273	0		b1 (slope)			0.00040437		0.000841225	0		b1 (slope)			0.00146712
	0.5	24.8	9.49209	32	39012.5					LOD and LOQ Yb:				0.000635695	0		syx (residual std. deviation)			0.000100983		0.000243309	0		syx (residual std. deviation)			6.03544e-05		0.000820252	0		syx (residual std. deviation)			9.21869e-05
	0.5	33.6	11.8968	24.8	39032.5					LOD =	0.2855	ng × L−1		0.000860823	0		n (number of points)			15		0.000304792	0		n (number of points)			15		0.000635369	0		n (number of points)			15
	0.5	28.8	9.49209	32.8	39027.7					LOQ =	0.856499	ng × L−1		0.000737938	0		cav (concentration average)			0.5		0.000243214	0		cav (concentration average)			0.5		0.000840429	0		cav (concentration average)			0.5
	0.5	28.8	10.3343	24	38582.5									0.000746454	0		t1−α;(n−2) (critical t-test value)			1.77093		0.00026785	0		t1−α;(n−2) (critical t-test value)			1.77093		0.000622045	0		t1−α;(n−2) (critical t-test value)			1.77093
	1	40.8001	16.7578	52.8001	37418.6					LOD and LOQ Tm:				0.00109037	0.25		Σ (ci − cav)2			2.5		0.000447847	0.25		Σ (ci − cav)2			2.5		0.00141107	0.25		Σ (ci − cav)2			2.5
	1	48.8001	23.1437	58.4001	38521.5					LOD =	0.120193	ng × L−1		0.00126683	0.25							0.0006008	0.25							0.00151604	0.25
	1	48.0001	16.7625	52.0001	37306.3					LOQ =	0.360579	ng × L−1		0.00128665	0.25							0.000449321	0.25							0.00139387	0.25
	1	56.8001	14.339	54.4001	39260.3									0.00144676	0.25							0.000365229	0.25							0.00138563	0.25
	1	54.4001	16.7343	64.0001	38304.1									0.00142022	0.25							0.000436881	0.25							0.00167084	0.25
	repeatability (precision):
	5; 10; 50; 100; and 500 ng × L−1 pentaplicate solutions of Lu3+, Yb3+ and Tm3+ (all in form of nitrate) were prepared by stepwise dilution of 1 ng × L−1 stock solutions in a matrix blank (2% HNO3) with Y3+ (in form of nitrate) internal standard solution.
	raw data													calculations Lu				calculations Yb				calculations Tm
	c, ng × L−1	175Lu, cps	174Yb, cps	169Tm, cps	89Y, cps									Lu/Y	c, ng × L−1	std. dev.		Yb/Y	c, ng × L−1	std. dev.		Tm/Y	c, ng × L−1	std. dev.
	5	271.203	89.544	284.003	40528.6									0.00669163	5	0.000498142		0.0022094	5	0.000178004		0.00700746	5	0.000362823
	5	226.402	79.9298	260.802	40489.3					repeatability Lu:				0.00559165				0.0019741				0.00644127
	5	283.203	89.5768	289.603	41832.5					c, ng × L−1	rel. std. dev.	repeatable:		0.00676993				0.00214132				0.00692292
	5	248.802	75.1204	264.002	41325.4					5	0.0788881	yes		0.00602056				0.00181778				0.00638838
	5	266.403	91.9112	252.802	40991.6					10	0.0316233	yes		0.00649895				0.0022422				0.00616717
	10	481.608	162.335	527.21	38188.6					50	0.0209072	yes		0.0126113	10	0.000414689		0.00425088	10	0.00028213		0.0138054	10	0.000347308
	10	528.01	178.359	555.209	38653					100	0.0224534	yes		0.0136602				0.00461436				0.0143639
	10	502.409	182.331	520.81	38659.5					500	0.0162155	yes		0.0129957				0.00471633				0.0134717
	10	510.409	191.945	524.81	38104.4									0.013395				0.00503735				0.0137729
	10	501.609	178.368	527.21	38870.5					repeatability Yb				0.0129046				0.00458879				0.0135633
	50	2567.43	865.584	2695.45	38475.8					c, ng × L−1	rel. std. dev.	repeatable:		0.0667285	50	0.00137189		0.0224969	50	0.000501245		0.0700559	50	0.00143662
	50	2585.83	845.573	2665.05	38556.8					5	0.085704	yes		0.0670656				0.0219306				0.0691201
	50	2487.42	877.604	2669.05	38964.3					10	0.0607838	yes		0.0638383				0.0225233				0.0684999
	50	2449.01	830.368	2663.45	37895.8					50	0.0227484	yes		0.0646248				0.0219119				0.0702834
	50	2523.42	816.8	2557.03	38331.4					100	0.0214076	yes		0.0658318				0.0213089				0.0667085
	100	5068.9	1736.07	5237.76	37638.3					500	0.0191706	yes		0.134674	100	0.00298936		0.046125	100	0.0009676		0.13916	100	0.00234947
	100	5124.92	1691.26	5309.79	38136.5									0.134384				0.0443475				0.139231
	100	4943.26	1663.26	5115.32	37434.6					repeatability Tm				0.13205				0.0444311				0.136647
	100	4908.04	1771.27	5257.8	38205.4					c, ng × L−1	rel. std. dev.	repeatable:		0.128465				0.0463618				0.137619
	100	5109.72	1679.23	5361.81	37542.1					5	0.0550948	yes		0.136106				0.0447294				0.142821
	500	25228.9	8557.41	26204.9	37526					10	0.0251755	yes		0.672303	500	0.0106188		0.228039	500	0.00423766		0.698313	500	0.00637625
	500	24590.8	8297.57	25566.9	37449.9					50	0.0208406	yes		0.656632				0.221565				0.682696
	500	24046.6	8070.22	25397.8	37202					100	0.016891	yes		0.64638				0.21693				0.682699
	500	24264.6	8231.9	25809.7	37511.6					500	0.00926793	yes		0.646855				0.219449				0.688045
	500	24374.4	8195.91	25724	37378.5									0.652096				0.219268				0.688202
	linearity (0.5‒500 ng × L−1 range):
	Duplicate solutions of Lu3+, Yb3+ and Tm3+ (all in form of nitrate) in concentration range of 0.5‒500 ng × L−1 were prepared by stepwise dilution of 1 g × L−1 stock solutions in a matrix blank (2% HNO3) with Y3+ (in form of nitrate) internal standard solution.
	raw data													calculations Lu													calculations Yb													calculations Tm
	c, ng × L−1	175Lu, cps	174Yb, cps	169Tm, cps	89Y, cps									c, ng × L−1	Lu/Y	yi	Yreg,i	I × (yi − yreg,i)2		yij − yi							c, ng × L−1	Yb/Y	yi	Yreg,i	I × (yi − yreg,i)2		yij − yi							c, ng × L−1	Tm/Y	yi	Yreg,i	I × (yi − yreg,i)2		yij − yi
	0.5	28	13.5015	32.8	38990.8									0.5	0.000718119	0.000676907	0.000820874	4.14528e-08		4.12121e-05							0.5	0.000346273	0.000294791	0.000206298	1.56623e-08		5.14822e-05							0.5	0.000841225	0.000830738	0.000991378	5.16103e-08		1.04868e-05
	0.5	24.8	9.49209	32	39012.5										0.000635695					-4.12121e-05		parameters Lu						0.000243309					-5.14822e-05		parameters Yb						0.000820252					-1.04868e-05		parameters Tm
	1	40.8001	16.7578	52.8001	37418.6					linearity Lu:				1	0.00109037	0.0011786	0.00148549	1.88364e-07		-8.82289e-05		b0 (intercept)			0.000156258		1	0.000447847	0.000524323	0.000431148	1.73634e-08		-7.64766e-05		b0 (intercept)			-1.85527e-05		1	0.00141107	0.00146355	0.00168176	9.52319e-08		-5.24864e-05		b0 (intercept)
	1	48.8001	23.1437	58.4001	38521.5					F =	0.0659092	linear:			0.00126683					8.82289e-05		b1 (slope)			0.00132923			0.0006008					7.64766e-05		b1 (slope)			0.0004497			0.00151604					5.24864e-05		b1 (slope)
	5	271.203	89.544	284.003	40528.6					Fcrit =	3.97152	yes		5	0.00669163	0.00614164	0.00680241	8.73251e-07		0.000549993		n (number of points)			14		5	0.0022094	0.00209175	0.00222995	3.81984e-08		0.000117652		n (number of points)			14		5	0.00700746	0.00672437	0.00720485	4.61738e-07		0.000283099		n (number of points)
	5	226.402	79.9298	260.802	40489.3										0.00559165					-0.000549993		I (number of repetitions)			2			0.0019741					-0.000117652		I (number of repetitions)			2			0.00644127					-0.000283099		I (number of repetitions)
	10	481.608	162.335	527.21	38188.6					linearity Yb:				10	0.0126113	0.0131358	0.0134486	1.95682e-07		-0.000524466		N (number of calibration points)			7		10	0.00425088	0.00443262	0.00447845	4.20115e-09		-0.000181737		N (number of calibration points)			7		10	0.0138054	0.0140847	0.0141087	1.15591e-09		-0.000279248		N (number of calibration points)
	10	528.01	178.359	555.209	38653					F =	0.0225285	linear:			0.0136602					0.000524466		Σ I × (yi − Yreg,i)2			5.84094e-06			0.00461436					0.000181737		Σ I × (yi − Yreg,i)2			3.67088e-07			0.0143639					0.000279248		Σ I × (yi − Yreg,i)2
	50	2567.43	865.584	2695.45	38475.8					Fcrit =	3.97152	yes		50	0.0667285	0.0668971	0.0666178	1.55974e-07		-0.00016854		Σ Σ (yij − yi)2			0.00012407		50	0.0224969	0.0222137	0.0224665	1.27745e-07		0.000283133		Σ Σ (yij − yi)2			2.28121e-05		50	0.0700559	0.069588	0.0693396	1.23413e-07		0.000467909		Σ Σ (yij − yi)2
	50	2585.83	845.573	2665.05	38556.8										0.0670656					0.00016854		F1−α;(N−2,n−N) (critical f-test value)			3.97152			0.0219306					-0.000283133		F1−α;(N−2,n−N) (critical f-test value)			3.97152			0.0691201					-0.000467909		F1−α;(N−2,n−N) (critical f-test value)
	100	5068.9	1736.07	5237.76	37638.3					linearity Tm:				100	0.134674	0.134529	0.133079	4.20118e-06		0.000145157							100	0.046125	0.0452362	0.0449515	1.62159e-07		0.000888765							100	0.13916	0.139196	0.138378	1.33632e-06		-3.53676e-05
	100	5124.92	1691.26	5309.79	38136.5					F =	0.0243718	linear:			0.134384					-0.000145157								0.0443475					-0.000888765								0.139231					3.53676e-05
	500	25228.9	8557.41	26204.9	37526					Fcrit =	3.97152	yes		500	0.672303	0.664468	0.664772	1.85042e-07		0.0078357							500	0.228039	0.224802	0.224832	1.7585e-09		0.00323738							500	0.698313	0.690505	0.690687	6.6569e-08		0.00780831
	500	24590.8	8297.57	25566.9	37449.9										0.656632					-0.0078357								0.221565					-0.00323738								0.682696					-0.00780831
	accuracy:
	Accuracy was determined in presence of "Senonorm™ Trace elements in whole blood" reference material (with certified concentration of 1.2 ng × L−1 Lu3+, 8.6 ng × L−1 Yb3+ and 2.3 ng × L−1 Tm3+.
	Blood samples were first diluted 20× (resulting Lu, Yb and Tm content lower then LOQ) followed by adition of Lu(NO3)3, Yb(NO3)3 and Tm(NO3)3 analytes to reach 250 ng × L−1 final concentration of the analytes.
	raw data													parameters Lu					parameters Yb					parameters Tm
	c, ng × L−1	Lu(NO3)3, ng × L−1	Yb(NO3)3, ng × L−1	Tm(NO3)3, ng × L−1										cav (concentration average)			253.008		cav (concentration average)			249.384		cav (concentration average)			256.172
	250	246.652	239.525	250.847										n (number of points)			5		n (number of points)			5		n (number of points)			5
		248.656	252.672	249.127						accuracy Lu:				sd (std. deviation)			6.14228		sd (std. deviation)			6.33063		sd (std. deviation)			5.75138
		250.971	251.957	258.97						t =	0.378023	acurate:		R (recovery)			1.01203		R (recovery)			0.997537		R (recovery)			1.02469
		257.622	247.045	261.556						tcrit =	2.77645	yes		u(R) (recovery uncertainty)			0.0318328		u(R) (recovery uncertainty)			0.0322376		u(R) (recovery uncertainty)			0.0308099
		261.14	255.724	260.358										t1−α;(n−1) (critical t-test value)			2.77645		t1−α;(n−1) (critical t-test value)			2.77645		t1−α;(n−1) (critical t-test value)			2.77645
										accuracy Yb:
										t =	0.0763923	acurate:
										tcrit =	2.77645	yes
										accuracy Tm:
										t =	0.801246	acurate:
										tcrit =	2.77645	yes

## Sheet: Validation_LC-MS-MS
		LC-MS/MS
	Reference:
	V. Barwick (Ed), Eurachem/CITAC Guide: Guide to Quality in Analytical Chemistry: An Aid to Accreditation (3rd ed. 2016). ISBN 978-0-948926-32-7. Available from www.eurachem.org.
	Validation was performed with HO2CPh{Lu} and HO2CPh{Tm} (toghether) in presence of mouse liver lysate (matrix blank) with HO2CPh{Y} as an internal standard. Concentration of stock solution of HO2CPh{Lu}, HO2CPh{Tm}
	and HO2CPh{Y} was determined by ICP-OES. Stock solution of matrix blank was obtained from 100 mg mouse liver that was processed (see Materials and Methods) into a final volume of 400 µL in MOPS/NaOH buffer (pH 7.0).
	limit of detection (LOD) and limit of quantification (LOQ):
	1, 2 and 5 nM triplicate solutions of HO2CPh{Lu} and HO2CPh{Tm} were prepared by combining 2, 4 and 10 µL of 10 nM stock solution mixture with 4 µL of matrix blanc, 2 µL of 1 µM HO2CPh{Y} internal standard solution and 12, 10 and 4 µL of 10 mM NH4OAc diluent solution.
	raw data (integration of peak area)												calculations Lu								calculations Tm
	c, nM	HO2CPh{Lu}	HO2CPh{Tm}	HO2CPh{Y}									Lu/Y	(ci − cav)2							Tm/Y	(ci − cav)2
	1	3100	21400	2180000									0.00142202	2.77778		parameters Lu					0.00981651	2.77778		parameters Tm
	1	4130	20200	2230000									0.00185202	2.77778		b0 (intercept)			-0.000275101		0.0090583	2.77778		b0 (intercept)			-0.000187827
	1	3170	17400	2200000					LOD and LOQ Lu:				0.00144091	2.77778		b1 (slope)			0.00170587		0.00790909	2.77778		b1 (slope)			0.00912572
	2	6840	39000	2090000					LOD =	0.566101	nM		0.00327273	0.444444		syx (residual std. deviation)			0.000433174		0.0186603	0.444444		syx (residual std. deviation)			0.00105857
	2	4960	39000	2140000					LOQ =	1.6983	nM		0.00231776	0.444444		n (number of points)			9		0.0182243	0.444444		n (number of points)			9
	2	6870	36600	2110000									0.00325592	0.444444		cav (concentration average)			2.66667		0.017346	0.444444		cav (concentration average)			2.66667
	5	16800	92200	2070000					LOD and LOQ Tm:				0.00811594	5.44444		t1−α;(n−2) (critical t-test value)			1.89458		0.0445411	5.44444		t1−α;(n−2) (critical t-test value)			1.89458
	5	17300	87200	1960000					LOD =	0.258602	nM		0.00882653	5.44444		Σ (ci − cav)2			26		0.0444898	5.44444		Σ (ci − cav)2			26
	5	16400	97400	2060000					LOQ =	0.775805	nM		0.00796117	5.44444							0.0472816	5.44444
	repeatability (precision):
	A 50 nM solution of HO2CPh{Lu} and HO2CPh{Tm} was prepared by mixing 3 µL of 500 nM stock solution mixture with 27 µL of a matrix blank stock solution. 10 nM pentaplicate solutions of HO2CPh{Lu}
	and HO2CPh{Tm} were prepared by combining 4 µL of 50 nM stock solution mixture in matrix blanc with 2 µL of 1 µM HO2CPh{Y} internal standard solution and 14 µL of 10 mM NH4OAc diluent solution.
	raw data												calculation Lu
	c, nM	HO2CPh{Lu}, nM	HO2CPh{Tm}, nM										c, nM	std. dev.
	50	53.4	52.9						c, nM	rel. std. dev.	repeatable:		50	1.70646
	50	49.7	47.4						50	0.0332773	yes
	50	52.7	47.1										calculation Tm
	50	49.7	48						c, nM	rel. std. dev.	repeatable:		c, nM	std. dev.
	50	50.9	53						50	0.0604435	yes		50	3.00283
	linearity (2‒1000 nM range for HO2CPh{Lu} and 1‒1000 nM range for HO2CPh{Tm}):
	1‒1000 nM duplicate solutions of HO2CPh{Lu} and HO2CPh{Tm} were prepared by combining 2‒10 µL of stock solution mixture of higher concentration with 4 µL of matrix blank, 2 µL of 1 µM HO2CPh{Y} internal standard solution and 4‒12 µL of 10 mM NH4OAc diluent solution (to reach final volume 20 µL). 1 nM HO2CPh{Lu} was excluded from linearity test due to peak area below LOQ.
	raw data (integration of peak area)																									calculations Tm
	c, nM	HO2CPh{Lu}	HO2CPh{Tm}	HO2CPh{Y}																						c, nM	Lu/Y	yi	Yreg,i	I × (yi − yreg,i)2		yij − yi
	1	below LOQ	27900	3360000									calculations Lu													1	0.00830357	0.00886845	0.0171023	0.000135592		-0.000564881
	1	below LOQ	28300	3000000									c, nM	Lu/Y	yi	Yreg,i	I × (yi − yreg,i)2		yij − yi								0.00943333					0.000564881
	2	7010	49600	2870000									2	0.00244251	0.00258489	0.00462387	8.31484e-06		-0.000142382							2	0.0172822	0.016753	0.0249657	0.000134896		0.000529227
	2	7800	46400	2860000					linearity Lu:					0.00272727					0.000142382								0.0162238					-0.000529227
	5	17200	112000	2850000					F =	0.0709217	linear:		5	0.00603509	0.00595768	0.00839006	1.18329e-05		7.7403e-05		parameters Lu					5	0.0392982	0.0398956	0.0485559	0.000150002		-0.000597356		parameters Tm
	5	16700	115000	2840000					Fcrit =	3.97152	yes			0.00588028					-7.7403e-05		b0 (intercept)			0.00211307			0.040493					0.000597356		b0 (intercept)			0.00923887
	10	37700	230000	2910000									10	0.0129553	0.0135829	0.0146671	2.35068e-06		-0.0006276		b1 (slope)			0.0012554		10	0.0790378	0.0810978	0.0878729	9.18037e-05		-0.00206005		b1 (slope)			0.00786341
	10	40500	237000	2850000										0.0142105					0.0006276		n (number of points)			14			0.0831579					0.00206005		n (number of points)			16
	50	189000	1140000	2800000					linearity Tm:				50	0.0675	0.06855	0.064883	2.68935e-05		-0.00105		I (number of repetitions)			2		50	0.407143	0.419571	0.402409	0.000589085		-0.0124286		I (number of repetitions)			2
	50	174000	1080000	2500000					F =	0.0407971	linear:			0.0696					0.00105		N (number of calibration points)			7			0.432					0.0124286		N (number of calibration points)			8
	100	394000	2430000	2910000					Fcrit =	3.58058	yes		100	0.135395	0.133763	0.127653	7.46546e-05		0.00163261		Σ I × (yi − Yreg,i)2			0.000317582		100	0.835052	0.830883	0.79558	0.0024927		0.00416837		Σ I × (yi − Yreg,i)2			0.0112062
	100	366000	2290000	2770000										0.13213					-0.00163261		Σ Σ (yij − yi)2			0.00626911			0.826715					-0.00416837		Σ Σ (yij − yi)2			0.36624
	500	1700000	10600000	2770000									500	0.613718	0.620728	0.629813	0.000165065		-0.00700941		F1−α;(N−2,n−N) (critical f-test value)			3.97152		500	3.82671	3.88416	3.94094	0.00644833		-0.0574455		F1−α;(N−2,n−N) (critical f-test value)			3.58058
	500	1720000	10800000	2740000										0.627737					0.00700941								3.94161					0.0574455
	1000	3340000	20700000	2770000									1000	1.20578	1.26129	1.25751	2.84705e-05		-0.0555089							1000	7.47292	7.89677	7.87265	0.00116376		-0.423843
	1000	3450000	21800000	2620000										1.31679					0.0555089								8.32061					0.423843
	accuracy:
	10 nM pentaplicate solutions of HO2CPh{Lu} and HO2CPh{Tm} were prepared by combining 2 µL of 100 nM stock solution mixture with 4 µL of matrix blank, 2 µL of 1 µM HO2CPh{Y} internal standard solution and 12 µL of 10 mM NH4OAc diluent solution.
	raw data												parameters Lu					parameters Tm
	c, nM	HO2CPh{Lu}, nM	HO2CPh{Tm}, nM										cav (concentration average)			10.156		cav (concentration average)			10.18
	10	9.08	10.1										n (number of points)			5		n (number of points)			5
		10.8	10.6						accuracy Lu:				sd (std. deviation)			0.716715		sd (std. deviation)			0.27559
		10.4	10.3						t =	0.209412	acurate:		R (recovery)			1.0156		R (recovery)			1.018
		10.7	9.93						tcrit =	2.77645	yes		u(R) (recovery uncertainty)			0.0744941		u(R) (recovery uncertainty)			0.0342641
		9.8	9.97										t1−α;(n−1) (critical t-test value)			2.77645		t1−α;(n−1) (critical t-test value)			2.77645
									accuracy Tm:
									t =	0.525331	acurate:
									tcrit =	2.77645	yes
